# Supplementary material
Source: PubMed Central journal article supplement (PMC4250383)

# S1.A

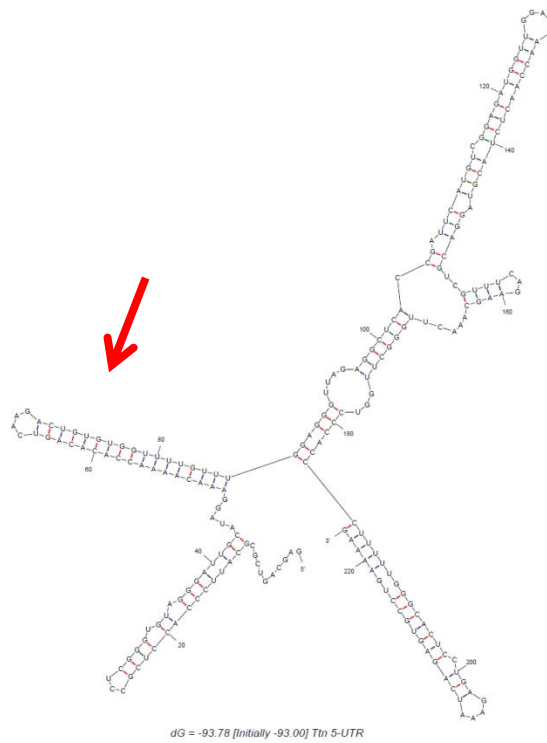

dG = -93.78 [Initially -93.00] Tln 5'-UTR

# S1.B

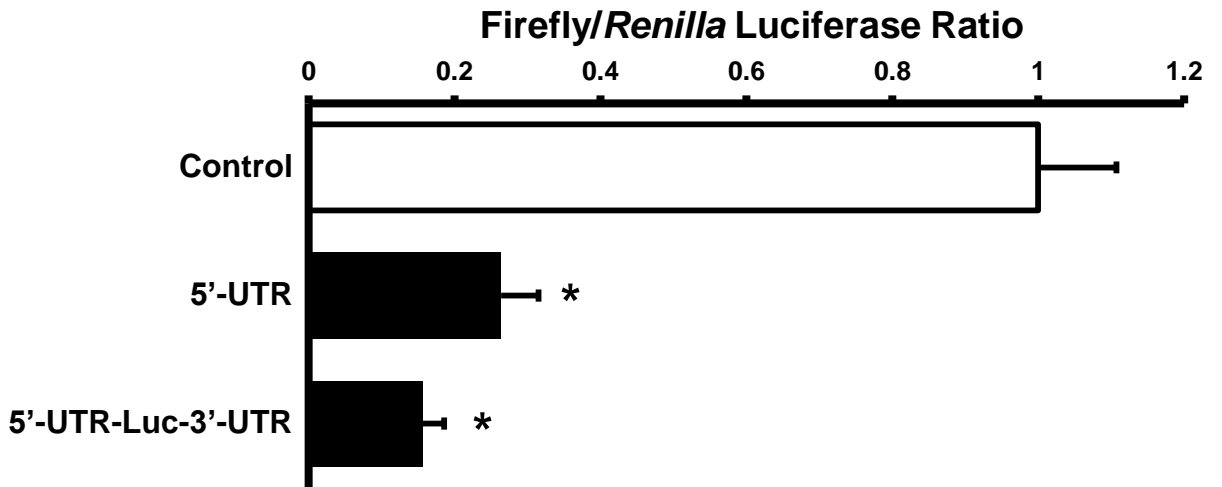

Supplement: NIHMS632832-supplement-1.pdf [file NIHMS632832-supplement-1.pdf]

## S2.A

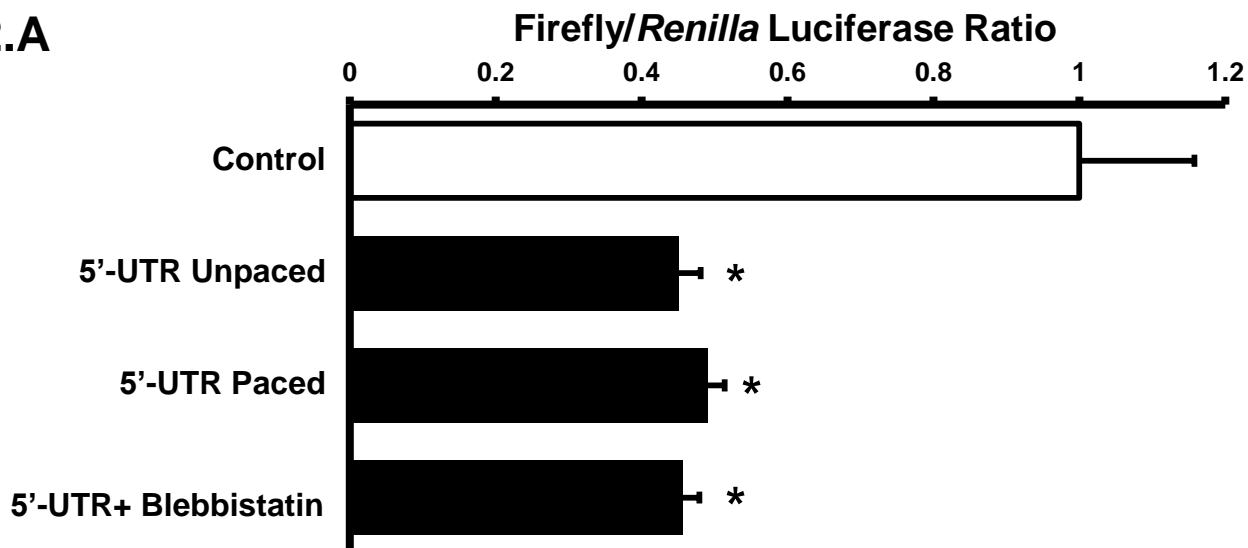

## S2.B

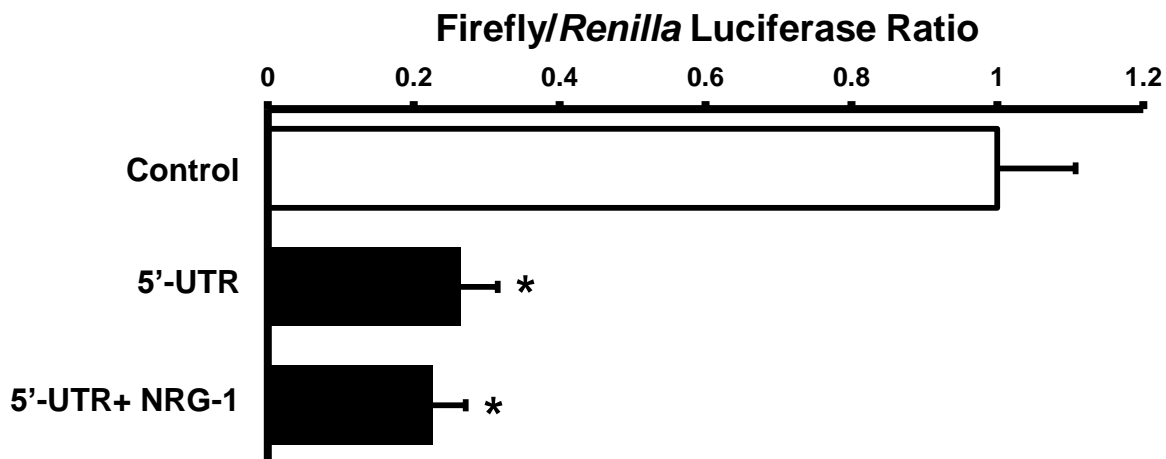

## S2.C

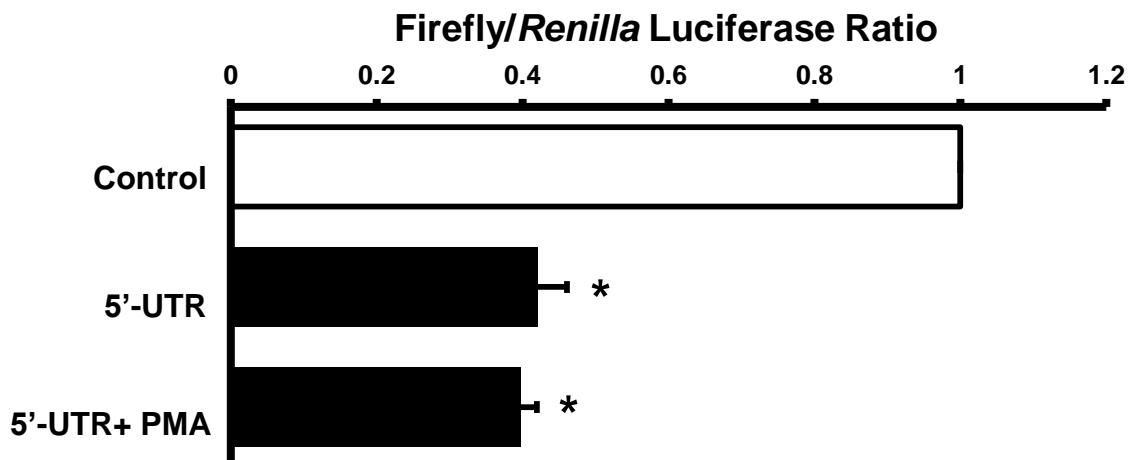

Supplement: NIHMS632832-supplement-2.pdf [file NIHMS632832-supplement-2.pdf]
